# Supplementary material for: An Image-Based Workflow for Objective Vessel Wall Enhancement Quantification in Intracranial Aneurysms
Source: MDPI journal article supplement (doi:10.3390/diagnostics11101742), 2021-09-22
Supplement: s1 [file s1]

# **Supplemental Information for: An Image-Based Workflow for Objective Vessel Wall Enhancement Quantification in Intracranial Aneurysms**

Sricharan S. Veeturi <sup>1,2</sup>, Nandor Pinter <sup>3,6</sup>, Andre Monteiro <sup>3</sup>, Ammad Baig <sup>3</sup>, Hamid Rai <sup>3</sup>, Muhammad Waqas <sup>1,3</sup>, Adnan H. Siddiqui <sup>1,3</sup>, Hamidreza Rajabzadeh-Oghaz <sup>1,3</sup>, \*Vincent M. Tutino <sup>1,2,3,4,5</sup>

**Affiliations:** <sup>1</sup>Canon Stroke and Vascular Research Center; <sup>2</sup>Department of Mechanical and Aerospace Engineering, <sup>3</sup>Department of Neurosurgery, <sup>4</sup>Department of Biomedical Engineering, <sup>5</sup>Department of Pathology and Anatomical Sciences, University at Buffalo, Buffalo, NY, USA; <sup>6</sup>Dent Neurologic Institute, Buffalo, NY, USA

**Email Addresses:** sanyasis@buffalo.edu, npinter@dentinstitute.com, amonteiro@ubns.com, abaig@ubns.com, hrai@ubns.com, mwaqas@ubns.com, asiddiqui@ubns.com, hrajabza@buffalo.edu, vincentt@buffalo.edu

**\*Corresponding author:**

Vincent Tutino, PhD

Canon Stroke and Vascular Research Center

Clinical and Translational Research Center

875 Ellicott Street

Buffalo, NY 14214 USA

E-mail: vincentt@buffalo.edu; Phone: (716) 829-5400

Fax: (716) 854-1850

## Supplemental Tables

**Supplementary Table S1:** Patient characteristics for training dataset. \*

| Characteristic             | Value            |
|----------------------------|------------------|
| Age                        | 66.9 ±15.0 years |
| Female gender              | 22/27 (81.5%)    |
| Smoking                    | 9/27 (33.3%)     |
| Hypertension               | 10/27 (37.0 %)   |
| Family history of IA       | 3/27 (11.1 %)    |
| Patients with Multiple IAs | 3/27 (11.1 %)    |
| IA Location                |                  |
| <i>PCom</i>                | 4/30 (13.3%)     |
| <i>ACom</i>                | 5/30 (16.7%)     |
| <i>ICA</i>                 | 17/30 (56.7 %)   |
| <i>MCA</i>                 | 13/30 (43.3%)    |
| <i>BA</i>                  | 2/30 (6.7%)      |
| IA size (max. height)      | 3.35±1.8 mm      |

\* (Abbreviations: IA= Intracranial Aneurysm, PCom= Posterior communicating artery, ACom= Anterior communicating artery, ICA= Internal carotid artery, MCA= Middle cerebral artery, BA= Basilar artery, max.= maximum)

**Supplementary Table S2:** Patient characteristics for testing dataset. \*

| Characteristic             | Value           |
|----------------------------|-----------------|
| Age                        | 72.1±10.2 years |
| Female gender              | 10/11 (90.9%)   |
| Smoking                    | 4/11 (36.4%)    |
| Hypertension               | 6/11 (54.5 %)   |
| Family history of IA       | 2/11 (18.2 %)   |
| Patients with Multiple IAs | 0/11 (0 %)      |
| IA Location                |                 |
| <i>PCom</i>                | 1/11 (9.1%)     |
| <i>ACom</i>                | 3/11 (27.3%)    |
| <i>ICA</i>                 | 2/11 (18.2 %)   |
| <i>MCA</i>                 | 4/11 (36.4%)    |
| <i>BA</i>                  | 1/11 (9.1%)     |
| IA size (max. height)      | 4.2±4.5 mm      |

\* (Abbreviations: IA= Intracranial Aneurysm, PCom= Posterior communicating artery, ACom= Anterior communicating artery, ICA= Internal carotid artery, MCA= Middle cerebral artery, BA= Basilar artery, max.= maximum)

## Supplemental Figures

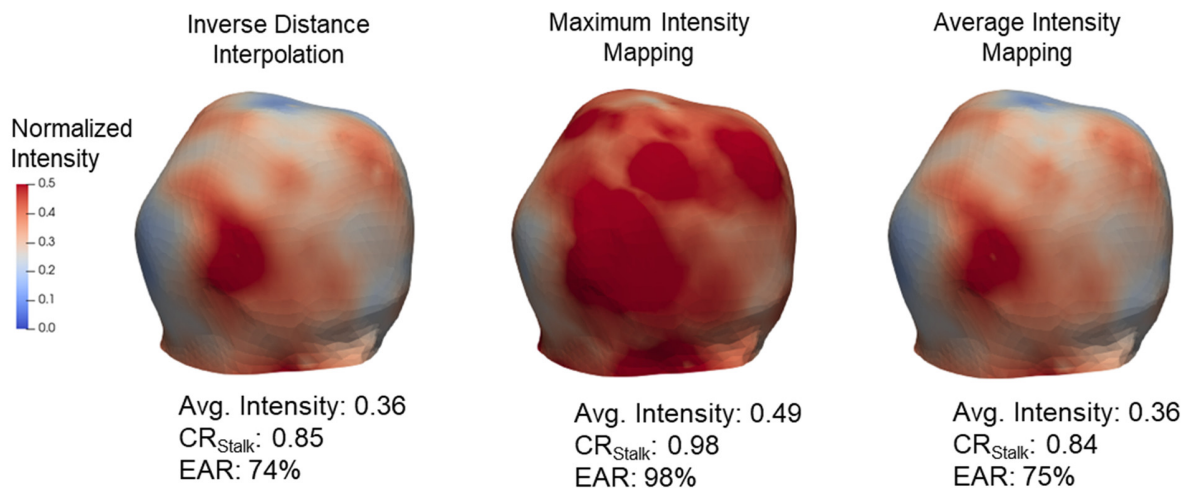

**Supplementary Figure S1. Sensitivity analysis of mapping technique.** Instead of using inverse distance weighted interpolation, we used the maximum intensity of selected voxels along the normal and also use the average. We observed there was a large change in all the VWE quantification metrics between the IDW interpolation and maximum intensity mapping. This is because based on the curvature, neighboring faces on the sac surface choose the same voxel intensity and map it onto the surface. The case shown above has 30% of the faces with the same intensity value as the neighboring face. However, we do not see any noticeable difference between inverse distance weighted interpolation mapping and average intensity mapping (Average intensity of all selected voxels).

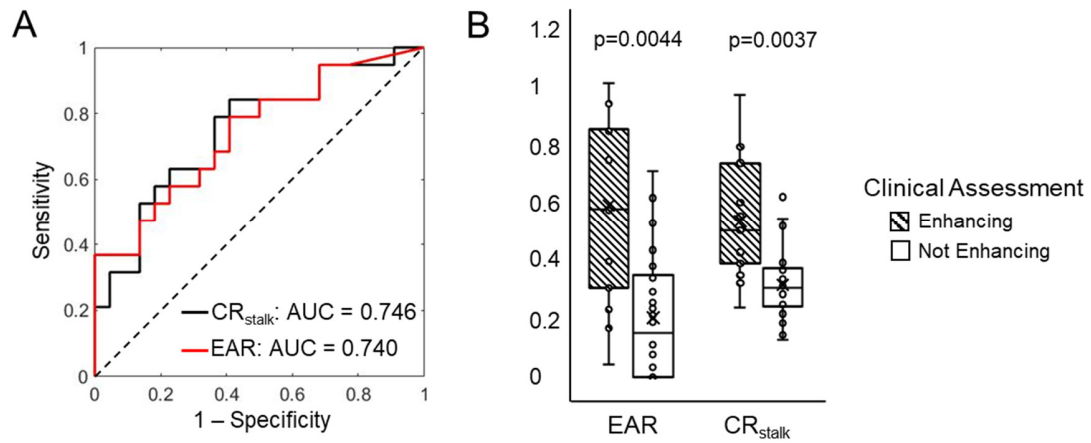

**Supplementary Figure S2: Clinical evaluations of IAs.** All the 41 cases present in this study were classified as enhancing or non-enhancing by 3 clinicians using both non-enhanced and contrast-enhanced MRI images. A majority voting system was used to then determine if each case had enhancement or not. We then used these binary labels to evaluate the performance of  $CR_{stalk}$  as well as EAR in delineating enhancing and non-enhancing aneurysms. **A).** The ROC curve shows  $CR_{stalk}$  has an AUC=0.75 and EAR 0.74. **B).** We also performed univariate analysis and found that EAR and  $CR_{stalk}$  are both significantly higher (EAR:  $p=0.004$ ;  $CR_{stalk}$ :  $p=0.004$ ) than in non-enhancing IAs.
